# Supplementary material for: Effect of Storage and Drying Treatments on Antioxidant Activity and Phenolic Composition of Lemon and Clementine Peel Extracts
Source: MDPI journal article supplement (doi:10.3390/molecules28041624), 2023-02-08
Supplement: s1 [file s1]

**Table S1.** Values of TPC and TFC parameters found in the hydroethanolic extracts of citrus peels during different drying treatments.

| Drying conditions             | Lemon peel extract |                                  |                                 | Clementine peel extract |                                  |                                 |
|-------------------------------|--------------------|----------------------------------|---------------------------------|-------------------------|----------------------------------|---------------------------------|
|                               | Time (h)           | TPC<br>(mg GAE·g <sup>-1</sup> ) | TFC<br>(mg QE·g <sup>-1</sup> ) | Time (h)                | TPC<br>(mg GAE·g <sup>-1</sup> ) | TFC<br>(mg QE·g <sup>-1</sup> ) |
| <b>Raw extract</b>            | 0                  | 2.1 ± 0.4                        | 30 ± 3                          | 0                       | 6.2 ± 0.8                        | 40 ± 2                          |
| <b>Oven drying at 40 °C</b>   | 2                  | 2.6 ± 0.4                        | 28 ± 2                          | 2                       | 9 ± 1                            | 43 ± 3                          |
|                               | 4                  | 1.1 ± 0.1                        | 28 ± 2                          | 4                       | 4.6 ± 0.2                        | 32 ± 3                          |
|                               | 6                  | 2.1 ± 0.2                        | 30 ± 1                          | 6                       | 5.0 ± 0.4                        | 41 ± 4                          |
|                               | 24                 | 1.0 ± 0.2                        | 27 ± 1                          | 24                      | 10.6 ± 0.4                       | 34 ± 1                          |
|                               | 48                 | 1.8 ± 0.3                        | 27 ± 1                          | 48                      | 8.1 ± 0.1                        | 34 ± 2                          |
|                               | 72                 | 2.8 ± 0.3                        | 25 ± 1                          | 72                      | 6.0 ± 0.4                        | 34 ± 3                          |
| <b>Oven drying at 60 °C</b>   | 2                  | 2.1 ± 0.2                        | 30 ± 3                          | 2                       | 8 ± 1                            | 39 ± 4                          |
|                               | 4                  | 2.4 ± 0.3                        | 23 ± 1                          | 4                       | 1.9 ± 0.4                        | 35 ± 2                          |
|                               | 6                  | 1.8 ± 0.3                        | 29.2 ± 0.5                      | 6                       | 2.9 ± 0.3                        | 33 ± 3                          |
|                               | 24                 | 2.2 ± 0.2                        | 27 ± 3                          | 29                      | 6 ± 1                            | 34 ± 2                          |
| <b>Vacuum-drying at 40 °C</b> | 2                  | 2.6 ± 0.4                        | 28.5 ± 0.7                      | 2                       | 12.4 ± 0.5                       | 40 ± 3                          |
|                               | 4                  | 1.1 ± 0.1                        | 29 ± 1                          | 4                       | 8 ± 1                            | 37 ± 3                          |
|                               | 6                  | 2.1 ± 0.2                        | 30 ± 1                          | 7                       | 5 ± 1                            | 39 ± 3                          |
| <b>Vacuum-drying at 60 °C</b> | 1                  | 1.7 ± 0.1                        | 28 ± 2                          | 2                       | 5 ± 1                            | 38 ± 1                          |
|                               | 2                  | 1.8 ± 0.2                        | 34 ± 1                          | 4                       | 4 ± 1                            | 37 ± 3                          |
|                               | 4                  | 2.1 ± 0.2                        | 33 ± 2                          | 6                       | 5.9 ± 0.5                        | 36 ± 2                          |

**Table S2.** Values of TPC, TFC and DPPH parameters determined in hydroethanolic extracts of citrus peels preserved at room temperature (control) and frozen.

| Storage conditions              | Time<br>(days) | Lemon peel extract               |                                 |                               | Clementine peel extract          |                                 |                               |
|---------------------------------|----------------|----------------------------------|---------------------------------|-------------------------------|----------------------------------|---------------------------------|-------------------------------|
|                                 |                | TPC<br>(mg GAE·g <sup>-1</sup> ) | TFC<br>(mg QE·g <sup>-1</sup> ) | DPPH<br>(mg·g <sup>-1</sup> ) | TPC<br>(mg GAE·g <sup>-1</sup> ) | TFC<br>(mg QE·g <sup>-1</sup> ) | DPPH<br>(mg·g <sup>-1</sup> ) |
| <b>Raw extract</b>              | 0              | 2.1 ± 0.4                        | 30 ± 3                          | 0.61 ± 0.08                   | 6.2 ± 0.8                        | 40 ± 2                          | 0.95 ± 0.03                   |
| <b>Control extract (20 °C)</b>  |                |                                  |                                 |                               |                                  |                                 |                               |
|                                 | 3              | 2.7 ± 0.1                        | 34.2 ± 0.3                      | 0.61 ± 0.01                   | 4.9 ± 0.1                        | 33.1 ± 0.4                      | 1.1 ± 0.1                     |
|                                 | 7              | 2.5 ± 0.2                        | 36.3 ± 0.9                      | 0.95 ± 0.03                   | 3.0 ± 0.1                        | 28 ± 2                          | 1.6 ± 0.1                     |
|                                 | 15             | 2.0 ± 0.1                        | 38 ± 1                          | 0.72 ± 0.02                   | 3.6 ± 0.2                        | 33 ± 3                          | 1.25 ± 0.03                   |
|                                 | 28             | 2.0 ± 0.2                        | 36.3 ± 0.8                      | 0.67 ± 0.01                   | 2.5 ± 0.1                        | 37 ± 2                          | 1.05 ± 0.08                   |
|                                 | 51             | 2.3 ± 0.2                        | 33 ± 2                          | 0.38 ± 0.01                   | 3.2 ± 0.1                        | 35 ± 1                          | 1.1 ± 0.1                     |
|                                 | 65             | 2.5 ± 0.4                        | 35.8 ± 0.9                      | 0.61 ± 0.02                   | 3.7 ± 0.2                        | 34 ± 1                          | 1.27 ± 0.03                   |
|                                 | 90             | 2.6 ± 0.3                        | 38 ± 1                          | 0.60 ± 0.01                   | 3.5 ± 0.2                        | 31 ± 1                          | 1.47 ± 0.07                   |
| <b>Frozen extract (- 20 °C)</b> |                |                                  |                                 |                               |                                  |                                 |                               |
|                                 | 3              | 2.8 ± 0.1                        | 33.3 ± 0.6                      | 0.75 ± 0.01                   | 5.0 ± 0.1                        | 32.6 ± 0.5                      | 1.1 ± 0.1                     |
|                                 | 7              | 2.9 ± 0.1                        | 34 ± 1                          | 0.52 ± 0.02                   | 4.7 ± 0.1                        | 28 ± 2                          | 1.81 ± 0.01                   |
|                                 | 15             | 2.5 ± 0.1                        | 34 ± 1                          | 0.59 ± 0.04                   | 4.8 ± 0.2                        | 32 ± 2                          | 1.21 ± 0.04                   |
|                                 | 28             | 2.5 ± 0.2                        | 32.1 ± 0.5                      | 0.57 ± 0.01                   | 5.3 ± 0.2                        | 36 ± 2                          | 1.2 ± 0.1                     |
|                                 | 51             | 1.9 ± 0.3                        | 31 ± 1                          | 0.23 ± 0.02                   | 5.8 ± 0.1                        | 35 ± 1                          | 1.10 ± 0.08                   |
|                                 | 65             | 2.3 ± 0.1                        | 34 ± 3                          | 0.43 ± 0.01                   | 6.1 ± 0.3                        | 34 ± 1                          | 0.76 ± 0.04                   |
|                                 | 90             | 3.1 ± 0.3                        | 37 ± 2                          | 0.62 ± 0.05                   | 5.9 ± 0.4                        | 36 ± 1                          | 1.32 ± 0.04                   |
